# Supplementary material for: Clinical utility of microRNA-451 as diagnostic biomarker for human cancers
Source: PubMed Central journal article supplement (PMC6331668; doi:10.1042/bsr20180653), 2019-01-15

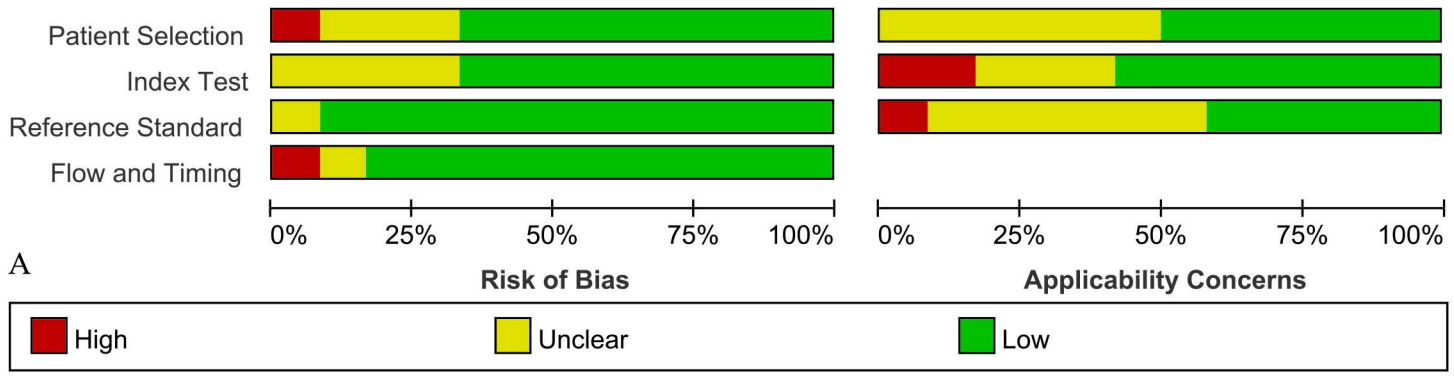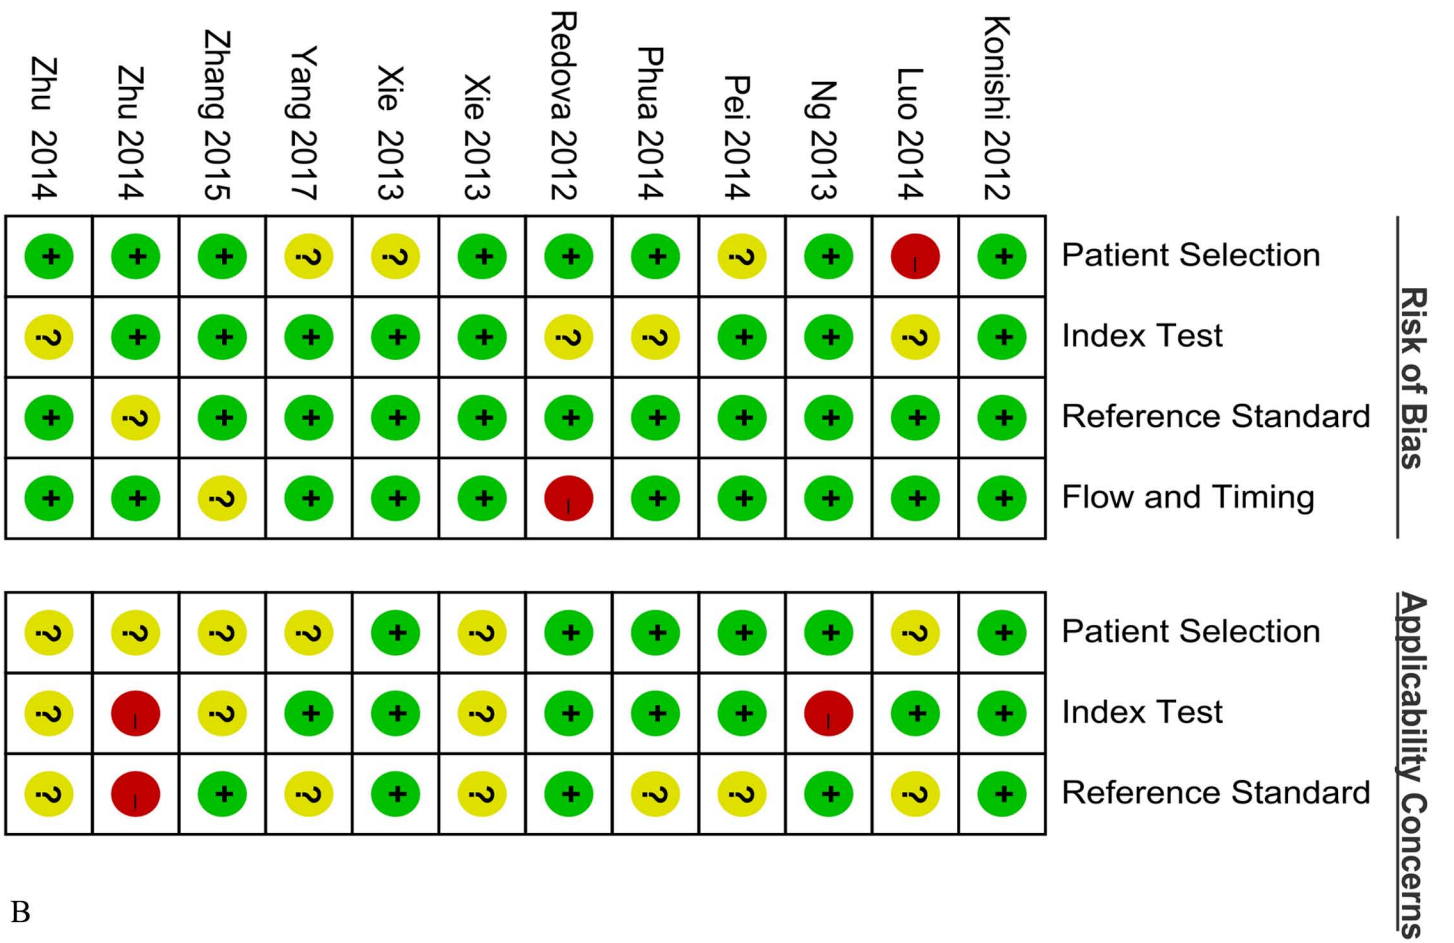

Supplement: bsr20180653_Supp1.pdf [file bsr20180653_Supp1.pdf]
